# Supplementary material
Source: PubMed Central journal article supplement (PMC5966598)
Supplement: rspb20180221supp1.pdf [file rspb20180221supp1.pdf]

## Supporting Online Material for

### **Multiple large inversions and breakpoint rewiring of gene expression in the evolution of the fire ant social supergene**

Yu-Ching Huang, Việt Đài Đặng, Ni-Chen Chang, and John Wang\*

\*To whom correspondence should be addressed. E-mail: johnwang@gate.sinica.edu.tw

DOI: 10.1098/rspb.2018.0221

**This PDF file includes:**

Supplementary figures S1 to S3

Supplementary tables S1 to S6

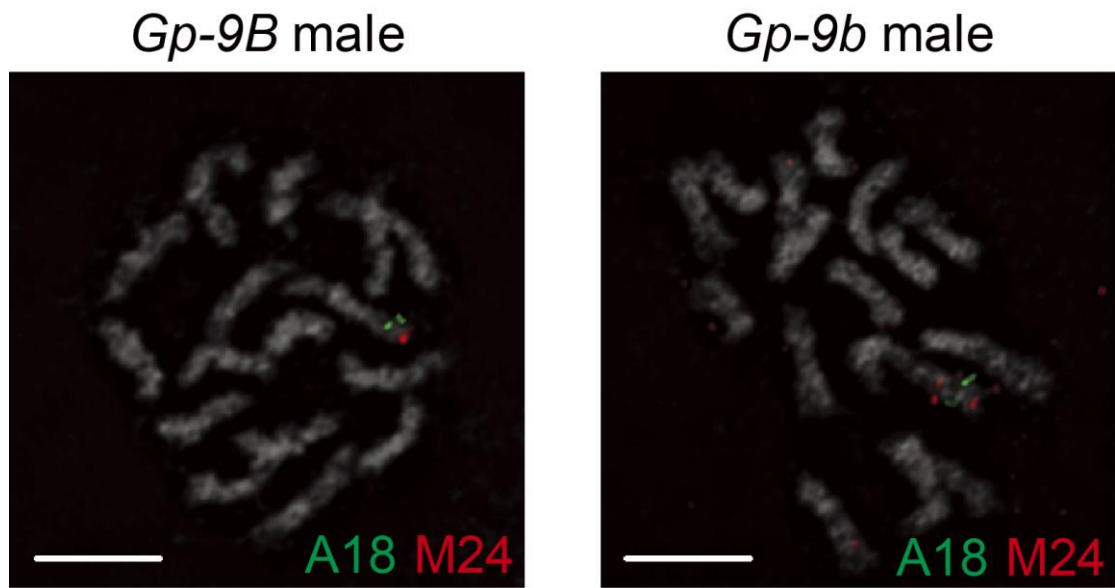

**Supplementary figure 1.** The original images of BAC-FISH in figure 1b. A18 (green signals) is an inner marker of the supergene for both *SB* and *Sb* social chromosomes. M24 probe (red) hybridized to the right side of the A18 signals on the *SB* social chromosome, whereas it hybridized to both sides of the A18 signal on the *Sb* chromosome. Scale bars, 5  $\mu$ m.

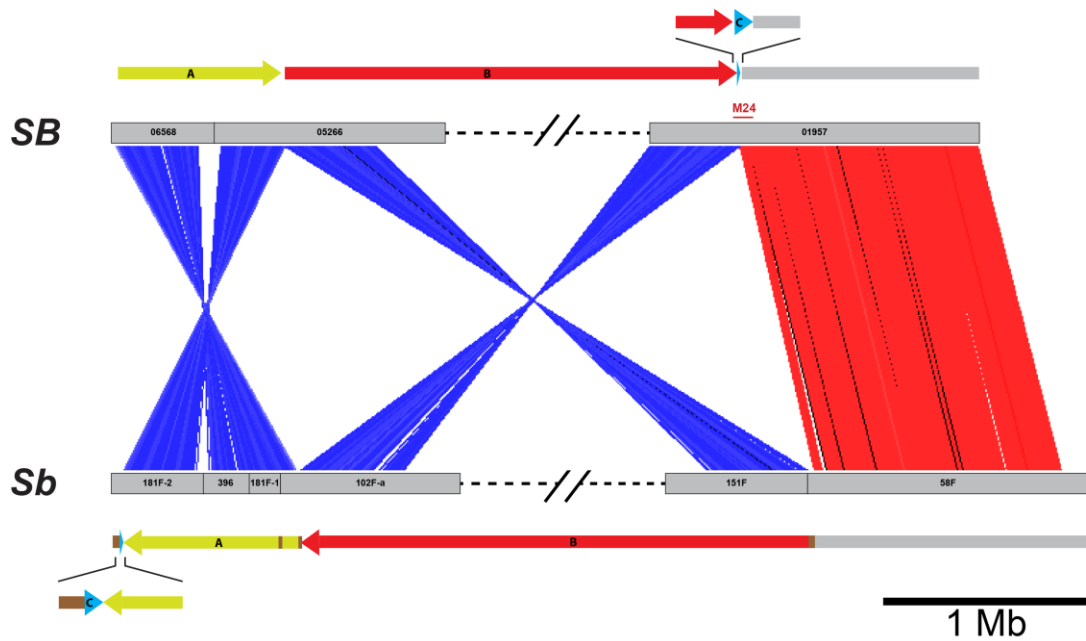

**Supplementary figure 2.** Comparison of the scaffold order between *SB* and *Sb* supergenes. The *SB* scaffolds (06568, 05266, and 01957) were assigned with genetic linkage evidence, whereas the *Sb* contigs (000181F-2, 000396F, 000181F-1, 000102F-a, 000151F, and 000058F) were oriented based on the identification of sequence fusions or inferred with the most likely neighboring contigs. Sequence comparisons were filtered and show only sequence fragments with score >1,400 and identity >90%; therefore the comparison for fragment C between *SB* and *Sb* is hidden due to its short length and low score (~600 bp, score = 1,051, identity = 99%). Sequence identities are color coded from light to bright (90% to 100%) for forward (red) and reverse (blue) alignments. Scaffold lengths are in scale, except the junctions (dash lines) between scaffold05266 and scaffold01957 in *SB*, and contigs 000102F-a and 000151F in *Sb*. Locations of BAC probes M24, and fragments A, B, and C depicted in figure 1a are shown.

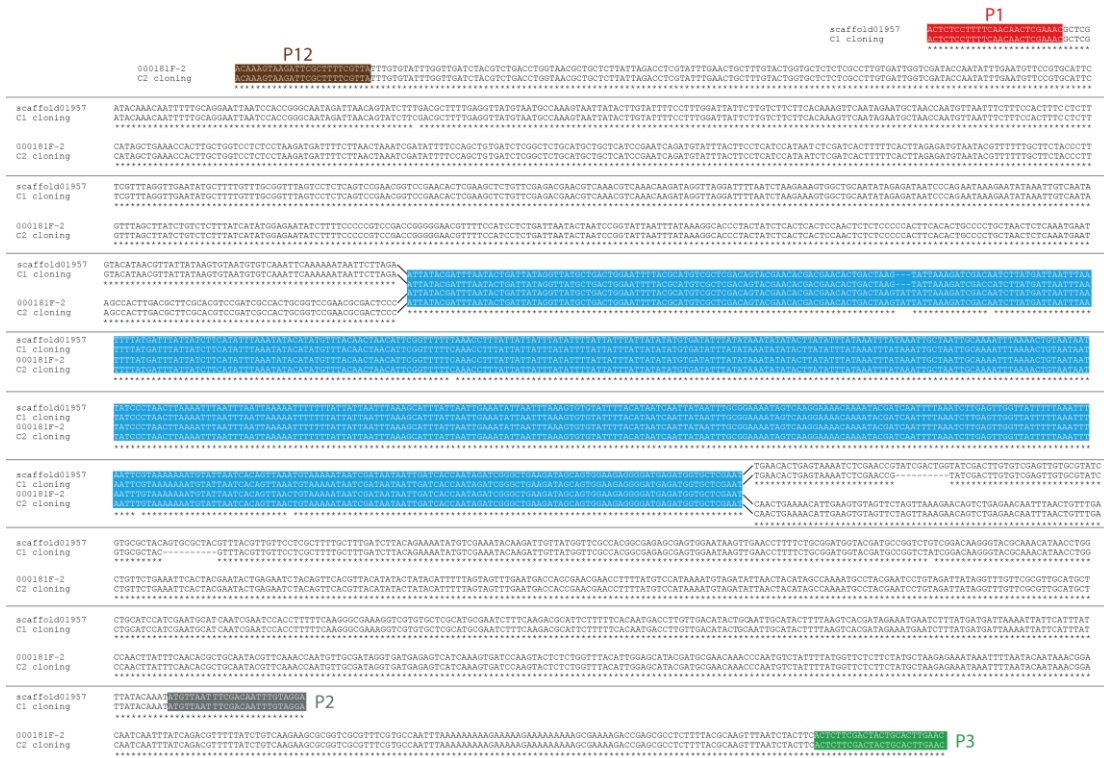

**Supplementary figure 3.** Sequence alignments of fragment C between the *SB* and *Sb* genomes. The *SB*- and *Sb*-specific fragment C with ~500 bp upstream and downstream flanking sequences from BigB\_G\_scaffold01957 and littleb\_000181F-2 were aligned independently with their corresponding cloned sequences C1 and C2. These two *SB*- and *Sb*-specific alignments were manually merged and re-aligned with respect to the locations of the fragment C sequences (blue background). Primers used for PCR amplifications of the cloning regions C1 (P1 and P2) and C2 (P2 and P3) are color coded as in figure 1a.

**Supplementary table 1. Bacterial artificial chromosome clones spanning scaffolds of the social chromosome**

| Plate | Well | Scaffold*                            | Location            | Reference                        |
|-------|------|--------------------------------------|---------------------|----------------------------------|
| 73    | A18  | Si_gnG.scaffold00480:286949-399624   | Supergene           | This study and Wang et al., 2013 |
| 73    | A22  | Si_gnG.scaffold02940:1084875-1181235 | Chromosome left end | Wang et al., 2013                |
| 73    | E03  | Si_gnG.scaffold01957:332331-441480   | Supergene           | Wang et al., 2013                |
| 73    | E17  | Si_gnG.scaffold07090:311160-399319   | Supergene           | Wang et al., 2013                |
| 73    | G23  | Si_gnG.scaffold00899:696857-795039   | Supergene           | Wang et al., 2013                |
| 145   | M24  | Si_gnG.scaffold01957:401094-493803   | Breakpoint          | This study                       |

\*End sequencing of the BAC clones with T7P and SP6 primers. Sequence ends were trimmed for high quality using DNA Baser (v4.36.0).

Wang J, Wurm Y, Nipitwattanaphon M, Riba-Grognuz O, Huang YC, Shoemaker D, and Keller L. 2013. AY-like social chromosome causes alternative colony organization in fire ants. *Nature* 493:664-668

**Supplementary table 2. Primers information used in this study**

| Name | Primer sequences (5'-3')          | <i>SB</i> scaffold   | <i>Sb</i> contig |
|------|-----------------------------------|----------------------|------------------|
| P1   | ACT CTC CTT TTC AAC AAC TCG AAA C | Si_gnG.scaffold01957 | 000102F-a        |
| P2   | TCC TAC AAA TTG TCG AAA TTA ACA T | Si_gnG.scaffold01957 | 000058F          |
| P3   | GTT CAA GTG CAG TAG TCG AAG AGT   | Si_gnG.scaffold05266 | 000181F-2        |
| P4   | TGA AGA ACT GTT ACT TTT GTG CAT C | Si_gnG.scaffold05266 | 000058F          |
| P5   | TTT TTC ACG TAT TCT GCG TTT TC    | Si_gnG.scaffold06568 | 000102F-a        |
| P6   | TAG AGG AAA AGT TTG CTT ATT CTG C | Si_gnG.scaffold06568 | 000181F-1        |
| P7   | AGT GGA GAG GAA GGT ATC CGT AG    |                      | 000058F          |
| P8   | TTG ATA TTC TGT AAC AAT TTG TGG A |                      | 000058F          |
| P9   | GAG AGG GCA AAG AAT TAG AGA GAG A |                      | 000102F-a        |
| P10  | GAT CAA TTT CTT ATG GTA ACG GCT A |                      | 000102F-a        |
| P11  | CCT CTT ACT CTC CTG GAT CTC ATG T |                      | 000181F-1        |
| P12  | ACA AAG TAA GAT TCG CTT TTC GTT A |                      |                  |

  

| Junction | Primer pair | Size (bp) | <i>SB</i> -specific | <i>Sb</i> -specific |
|----------|-------------|-----------|---------------------|---------------------|
| C1       | P1 + P2     | 1,502     | x                   |                     |
| C2       | P12 + P3    | 1,751     |                     | x                   |
| J1       | P3 + P4     | 888       | x                   |                     |
| J2       | P5 + P6     | 1,078     | x                   |                     |
| J3       | P7 + P2     | 787       |                     | x                   |
| J4       | P4 + P8     | 840       |                     | x                   |
| J5       | P9 + P1     | 771       |                     | x                   |
| J6       | P10 + P5    | 1,057     |                     | x                   |
| J7       | P6 + P11    | 1,066     |                     | x                   |

**Supplementary table 3. Summary of the expression of the three target genes in the worker antennae RNA-seq datasets.**

Each library is a pool of 36 to 53 pairs of antennae of the same Gp-9 genotype and from the same colony.

<sup>a</sup>Number of reads produced by Illumina sequencing using the HiSeq platform

<sup>b</sup>Number of mapped reads by BWA-mem

<sup>c</sup>Total mapped reads for all genes as calculated by HTSeq-count.

<sup>d</sup>Number of reads mapped to the gene region

<sup>e</sup>The expression value of the target genes (Gene\_read) normalized by the library size (Mapped\_read)(count-per-million, CPM)

<sup>(\*)</sup>Pairs of reads

<sup>(\*\*)</sup>Both singly and properly paired mapped reads are calculated as 1 in HTSeq-count by default

| Sample ID | Social form | Genotype | #pairs of antennae | Library <sup>a(*)</sup> | BWA_mapped <sup>b(*)</sup> | Mapped_read <sup>c(**)</sup> | SINV23002-SINV23011        |                  | SINV22157                  |                  | SINV22107                  |                  |
|-----------|-------------|----------|--------------------|-------------------------|----------------------------|------------------------------|----------------------------|------------------|----------------------------|------------------|----------------------------|------------------|
|           |             |          |                    |                         |                            |                              | Gene_read <sup>d(**)</sup> | CPM <sup>e</sup> | Gene_read <sup>d(**)</sup> | CPM <sup>e</sup> | Gene_read <sup>d(**)</sup> | CPM <sup>e</sup> |
| M_BB2     | Monogyne    | SB/SB    | 39.5               | 29,197,782              | 25,362,865                 | 33,029,573                   | 195                        | 5.90             | 96                         | 2.91             | 1,240                      | 37.54            |
| M_BB3     |             |          | 53                 | 29,815,211              | 29,129,293                 | 34,459,212                   | 187                        | 5.43             | 176                        | 5.11             | 1,190                      | 34.53            |
| M_BB6     |             |          | 40                 | 30,629,100              | 29,890,678                 | 41,952,749                   | 141                        | 3.36             | 248                        | 5.91             | 1,860                      | 44.34            |
| M_BB7     |             |          | 40.5               | 23,908,640              | 22,751,357                 | 28,103,927                   | 163                        | 5.80             | 135                        | 4.80             | 1,749                      | 62.23            |
| P_BB2     | Polygyne    | SB/SB    | 39.5               | 27,570,550              | 26,682,410                 | 28,295,241                   | 225                        | 7.95             | 258                        | 9.12             | 1,396                      | 49.34            |
| P_BB3     |             |          | 53                 | 29,718,335              | 28,771,536                 | 37,040,319                   | 139                        | 3.75             | 186                        | 5.02             | 2,040                      | 55.08            |
| P_BB6     |             |          | 40                 | 26,978,725              | 26,341,745                 | 31,499,190                   | 84                         | 2.67             | 233                        | 7.40             | 1,314                      | 41.72            |
| P_BB7     |             |          | 36                 | 28,093,637              | 27,250,328                 | 27,664,357                   | 117                        | 4.23             | 170                        | 6.15             | 1,292                      | 46.70            |
| P_Bb2     | Polygyne    | SB/Sb    | 39.5               | 30,670,661              | 29,736,108                 | 32,939,344                   | 176                        | 5.34             | 464                        | 14.09            | 2,182                      | 66.24            |
| P_Bb3     |             |          | 53                 | 24,020,182              | 23,038,506                 | 30,015,219                   | 156                        | 5.20             | 390                        | 12.99            | 1,718                      | 57.24            |
| P_Bb6     |             |          | 40                 | 30,685,360              | 29,891,124                 | 36,937,213                   | 163                        | 4.41             | 519                        | 14.05            | 1,851                      | 50.11            |
| P_Bb7     |             |          | 36                 | 28,858,541              | 28,082,134                 | 14,064,349                   | 80                         | 5.69             | 192                        | 13.65            | 768                        | 54.61            |

**Supplementary table 4. Statistical test of the expression of the three target genes in the worker antennae**

<sup>a</sup>Log2-fold change

<sup>b</sup>*P*-value produced by applying quasi-likelihood F-test for differential expression of each gene by edgeR

<sup>c</sup>Adjusted p-value threshold for the 9 tests using Bonferroni method at 5% false discovery rate

<sup>d</sup>*P*-value adjusted for multiple testing using Benjamini-Hochberg method at 5% false discovery rate for whole antennal expressed gene set (FDR)

\*P\_Bb = Polygyne SB/Sb; P\_BB = Polygyne SB/SB; M\_BB = Monogyne SB/SB

| Gene                | Pairwise comparison * | logFC <sup>a</sup> | <i>P</i> -value <sup>b</sup> | 9-test-FDR <sup>c</sup> | library-FDR <sup>d</sup> |
|---------------------|-----------------------|--------------------|------------------------------|-------------------------|--------------------------|
| SINV23002-SINV23011 | P_Bb vs P_BB          | 0.15               | 0.70                         | 0.0056                  | 1.00                     |
|                     | P_Bb vs M_BB          | 0.0085             | 0.98                         | 0.0056                  | 1.00                     |
|                     | P_BB vs M_BB          | -0.14              | 0.71                         | 0.0056                  | 1.00                     |
| SINV22157           | P_Bb vs P_BB          | 0.99               | 0.0051                       | 0.0056                  | 1.00                     |
|                     | P_Bb vs M_BB          | 1.55               | 2.10E-005                    | 0.0056                  | 0.01                     |
|                     | P_BB vs M_BB          | 0.56               | 0.11                         | 0.0056                  | 1.00                     |
| SINV22107           | P_Bb vs P_BB          | 0.24               | 0.39                         | 0.0056                  | 1.00                     |
|                     | P_Bb vs M_BB          | 0.35               | 0.21                         | 0.0056                  | 0.99                     |
|                     | P_BB vs M_BB          | 0.11               | 0.70                         | 0.0056                  | 1.00                     |



**Supplementary table 5. Allelic specific expression of the three genes in *SB/Sb* worker antennae**

Data are merged RNA-seq data from four bioreplicates of polygyne worker antennae. Each bioreplicate was an amplified RNA pool of at least 40 pairs of antennae.

<sup>a</sup>position to the coding DNA sequence (CDS)

<sup>b</sup>SNP/indel in sense strand

<sup>c</sup>Number of reads called by GATK software

<sup>d</sup>Two-tailed binomial test for difference from equality

<sup>e</sup>Two-tailed binomial test for difference from equality for the summed gene reads

<sup>f</sup>Explanation of invalid data

| Gene name              | Position      |                  | Allele (SNP or indel) <sup>b</sup> |            | Read count <sup>c</sup> |     |       |          | <i>P</i> -value <sup>d</sup> | Read sum across gene <sup>c</sup> |     |       |          | <i>P</i> -value <sup>e</sup> | Note <sup>f</sup> |                                                   |
|------------------------|---------------|------------------|------------------------------------|------------|-------------------------|-----|-------|----------|------------------------------|-----------------------------------|-----|-------|----------|------------------------------|-------------------|---------------------------------------------------|
|                        | Si_gnG        | CDS <sup>a</sup> | SB                                 | Sb         | SB                      | Sb  | Total | Sb/Total |                              | SB                                | Sb  | Total | Sb/Total |                              |                   |                                                   |
| SINV22107              | scaffold01957 | 439993           | -67                                | C          | T                       | -   | -     | -        | NA                           | NA                                | 401 | 605   | 1006     | 0.60                         | 1.35E-10          | reads with mutation, not called (total count: 89) |
|                        |               | 440988           | 929                                | G          | A                       | 61  | 107   | 168      | 0.64                         | 0.0004806                         |     |       |          |                              |                   |                                                   |
|                        |               | 440991           | 932                                | C          | T                       | 61  | 104   | 165      | 0.63                         | 0.0010159                         |     |       |          |                              |                   |                                                   |
|                        |               | 441210           | 1151                               | G          | A                       | 85  | 122   | 207      | 0.59                         | 0.0121579                         |     |       |          |                              |                   |                                                   |
|                        |               | 441318           | 1259                               | T          | C                       | 93  | 127   | 220      | 0.58                         | 0.0258664                         |     |       |          |                              |                   |                                                   |
|                        |               | 441857           | 1798                               | T          | C                       | 101 | 145   | 246      | 0.59                         | 0.0060015                         |     |       |          |                              |                   |                                                   |
| SINV22157              | scaffold01957 | 439234           | -617                               | C          | G                       | 14  | 149   | 163      | 0.91                         | 1.14E-29                          | 152 | 491   | 643      | 0.76                         | 1.53E-42          |                                                   |
|                        |               | 439145           | -529                               | CGTTCGGACT | T                       | 26  | 52    | 78       | 0.67                         | 0.0043349                         |     |       |          |                              |                   |                                                   |
|                        |               | 439077           | -460                               | C          | T                       | 23  | 45    | 68       | 0.66                         | 0.0103377                         |     |       |          |                              |                   |                                                   |
|                        |               | 438865           | -248                               | T          | G                       | 23  | 55    | 78       | 0.71                         | 0.0003778                         |     |       |          |                              |                   |                                                   |
|                        |               | 438677           | -60                                | T          | C                       | 20  | 108   | 128      | 0.84                         | 8.59E-16                          |     |       |          |                              |                   |                                                   |
|                        |               | 437405           | 1213                               | C          | T                       | 22  | 34    | 56       | 0.61                         | 0.1408954                         |     |       |          |                              |                   |                                                   |
|                        |               | 436803           | 1815                               | A          | T                       | 24  | 48    | 72       | 0.67                         | 0.0063098                         |     |       |          |                              |                   |                                                   |
| SINV23002<br>SINV23011 | scaffold05266 | 344039           | 5                                  | G          | A                       | -   | -     | -        | NA                           | NA                                | 248 | 351   | 599      | 0.59                         | 2.95E-05          | no polymorphism (total count: 17)                 |
|                        |               | 344088           | 54                                 | A          | G                       | 41  | 28    | 69       | 0.41                         | 0.1480322                         |     |       |          |                              |                   |                                                   |
|                        |               | 345505           | 1471                               | A          | G                       | 45  | 47    | 92       | 0.51                         | 0.9170405                         |     |       |          |                              |                   |                                                   |
|                        |               | 345926           | 1892                               | T          | C                       | 64  | 90    | 154      | 0.58                         | 0.0435999                         |     |       |          |                              |                   |                                                   |
|                        |               | 346219           | 2185                               | A          | G                       | 49  | 92    | 141      | 0.65                         | 0.0003682                         |     |       |          |                              |                   |                                                   |
|                        |               | 346238           | 2204                               | T          | C                       | 49  | 94    | 143      | 0.66                         | 0.0002095                         |     |       |          |                              |                   |                                                   |

**Supplementary table 6. The expression of SINV22157, *Gp-9* and an elongation factor gene (NCBI accession EH413242.1) in public datasets.**

All the RNAseq data are from whole bodies

Raw reads were mapped against the fire ant genome by TopHat. Expression level is shown in FPKM (fragments per kilobase of transcript per million mapped reads).

The expression of the target gene SINV22157 is shown in comparison with the expression of the well-known *Gp-9* and an elongation factor (NCBI accession EH413242.1)

| Dataset   | Social_form | Caste  | SINV22157 | EH413242.1 | <i>Gp-9</i> | REF                    |
|-----------|-------------|--------|-----------|------------|-------------|------------------------|
| SRR619836 | Polygyne    | Queen  | 16.4      | 57.7       | 2,736.5     | Wang et al. (2013)     |
| SRR619837 |             |        | 17.5      | 53.6       | 18,084.2    |                        |
| SRR619838 |             |        | 19.6      | 53.0       | 7,479.5     |                        |
| SRR619849 |             |        | 19.1      | 53.5       | 25,162.4    |                        |
| SRR619956 |             |        | 16.0      | 60.8       | 6,245.8     |                        |
| SRR619976 |             |        | 18.1      | 59.0       | 14,649.4    |                        |
| DRS023309 | Monogyne    | Queen  | 19.5      | 62.8       | 8,470.5     | Morandin et al. (2016) |
| DRS023310 |             |        | 29.8      | 30.6       | 2,014.9     |                        |
| DRS023311 |             |        | 18.9      | 23.0       | 2,263.0     |                        |
| DRS023312 | Monogyne    | Worker | 10.0      | 15.5       | 13,802.6    | Morandin et al. (2016) |
| DRS023313 |             |        | 4.1       | 11.7       | 53.8        |                        |
| DRS023314 |             |        | 6.2       | 16.6       | 13,079.8    |                        |
| DRS023315 | Polygyne    | Queen  | 25.7      | 15.4       | 1,531.7     | Morandin et al. (2016) |
| DRS023316 |             |        | 10.3      | 17.1       | 6,508.6     |                        |
| DRS023317 |             |        | 19.3      | 46.1       | 19,383.9    |                        |
| DRS023318 | Polygyne    | Worker | 11.1      | 22.4       | 23,875.4    | Morandin et al. (2016) |
| DRS023319 |             |        | 7.5       | 35.9       | 15,195.0    |                        |
| DRS023320 |             |        | 8.6       | 20.7       | 38,939.5    |                        |

Morandin C, Tin MMY, Abril S, Gómez C, Pontieri L, Schjøtt M, Sundström L, Tsuji K, Pedersen JS, Helanterä H and Mikheyev AS. 2013. Comparative transcriptomics reveals the conserved building blocks involved in parallel evolution of diverse phenotypic traits in ants. *Genome Biology* 17:43
